# Supplementary material
Source: MDPI journal article supplement (https://www.mdpi.com/1999-4907/6/9/3075)
Supplement: s1 [file s1]

Supplementary

**Table S1.** Central European forest communities in which *Fraxinus excelsior* is an integral component. Given are phytosciological communities (associations), the constancy of occurrence in synoptic phytosociological tables (based on [13]), the codes of the corresponding habitat type of the Annex I of the Habitats Directive, and the conservation status of the corresponding habitat type (based on the national Red List of Biotopes for Austria, [33]). Conservation status:
1—critically endangered; 2—endangered; 3—threatened; G—potentially threatened, but data deficient; R—currently not threatened, but extremely rare; *****—not threatened; D—data deficient; -—not of high nature conservation value, thus not assessed; NA—not available; AT—Austria.

| Class | Alliance | Association | Constancy of occurrence (%) | Habitats Directive  Annex I | Conservation status (AT) * |
| --- | --- | --- | --- | --- | --- |
| Forests |  |  |  |  |  |
| *Querco-Fagetea* | *Quercion pubescenti-petraeae* | *Peucedano oreoselini-Quercetum pubescentis* | 19 | 91H0 (prior.) | 3 |
| *Gerranio sanguinei-Quercetum pubescentis* | 22 | 91H0 (prior.) | 3 |
| *Inulo ensifoliae-Quercetum pubescentis* | 47 | 91H0 (prior.) | R |
| *Lithospermo-Quercetum pubescentis* | 21 | 91H0 (prior.) | 3 |
| *Corno-Quercetum* | 6 | 91I0 (prior.) | 2 |
| *Euphorbio angulatae-Quercetum* | 49 | 91I0 (prior.) | 2–3 |
| *Digitali grandiflorae-Quercetum* | 58 | - | G |
| *Sorbo torminalis-Quercetum* | 9 | 91M0 | 2–3 |
| *Chamaecytiso-Quercetum cerridis* | 2 | 91M0 | 2 |
| *Alnenion  glutinoso-incanae* | *Pruno-Fraxinetum* | 83 | 91E0 (prior.) | 2–3 |
| *Carici remotae-Fraxinetum* | 80 | 91E0 (prior.) | 3 |
| *Stellario bulbosae-Fraxinetum* | 66 | 91E0 (prior.) | 2–3 |
| *Stellario nemorum-Alnetum glutinosae* | 68 | 91E0 (prior.) | 3 |
| *Fraxino-Populetum* | 26 | 91E0 (prior.) | 2–3 |
| *Equiseto-Alnetum incanae* | 36 | 91E0 (prior.) | 2–3 |
| *Aceri-Alnetum incanae* | 10 | 91E0 (prior.) | 3 |
| *Carici rostratae-Alnetum incanae* | 6 | - | D |
| *Ulmenion* | *Carici albae-Tilietum* | 88 | 91F0 | D |
| *Fraxino-Ulmetum* | 70 | 91F0 | 2 |
| *Tilio-Acerion* | *Aceri-Tilietum* | 63 | 9180 (prior.) | 3 |
| *Arunco-Tilietum* | 46 | 9180 (prior.) | 2 |
| *Asperulo-taurinae-Tilietum* | 82 | 9180 (prior.) | 3 |
| *Scillo-Fraxinetum* | 97 | 9180 (prior.) | 3 |
| *Phyllitido-Aceretum* | 81 | 9180 (prior.) | 3 |

**Table S1.** *Cont.*

| Class | Alliance | Association | Constancy of occurrence (%) | Habitats Directive  Annex I | Conservation status (AT) * | |
| --- | --- | --- | --- | --- | --- | --- |
| Forests |  |  |  |  |  | |
| *Querco-Fagetea* | *Tilio-Acerion* | *Arunco-Aceretum* | 68 | 9180 (prior.) | 3 | |
| *Ulmo-Aceretum* | 36 | 9180 (prior.) | 3 | |
| *Carici pendulae-Aceretum* | 97 | 9180 (prior.) | 3 | |
| *Hacquetio-Fraxinetum* | 89 | 9180 (prior.) | 2–3 | |
| *Carpinion betuli* | *Stellario-Carpinetum* | 50 | 9160 | | 2 |
| *Pseudostellario-Carpinetum* | 23 | 91L0 | | 2 |
| *Galio sylvatici-Carpinetum* | 15 | 9170 | | 2 |
| *Polygonato latifolii-Carpinetum* | 35 | 91G0 (prior.) | | 2 |
| *Epimedio-Carpinetum* | 37 | 91L0 | | 1–2 |
| *Fagion sylvaticae* | *Carici albae-Fagetum* | 40 | 9150 | | 3 |
| *Taxo-Fagetum* | 32 | 9150 | | 3 |
| *Cyclamini-Fagetum* | 23 | 9150 | | 3 |
| *Helleboro nigri-Fagetum* | 35 | 9150 | | 3 |
| *Poo stiriacae-Fagetum* | 2 | 9150 | | 3 |
| *Hacquetio-Fagetum* | 13 | 91K0 | | 2 |
| *Galio odorati-Fagetum* | 3 | 9130 | | 2–3 |
| *Mercuriali-Fagetum* | 33 | 9130 | | 2–3 |
| *Athyrio-Fagetum* | 14 | 9140 | | 3 |
| *Lamio orvalae-Fagetum* | 9 | 91K0 | | R |
| *Adenostylo glabrae-Fagetum* | 8 | 9130 | | 3 |
| *Anemono trifoliae-Fagetum* | 2 | 91K0 | | 3 |
| *Lonicero alpigenae-**Fagetum* | 2 | 9130 | | 3 |
| *Cardamino trifoliae-Fagetum* | 15 | 9130 | | 3 |
| *Dentario pentaphylli-Fagetum* | 2 | 91K0 | | 3 |
| *Saxifrago rotundifoliae-Fagetum* | 5 | 9140 (Northern Alps), 91K0 (Southern Alps) | | 3 |
| *Alnetea glutinosae* | *Alnion glutinosae* | *Carici elongatae-Alnetum* | 14 | - | | 2 |
| *Sphagno-Alnetum* | 13 | - | | 2 |
| Shrubs |  |  |  |  | |  |
| *Salicetea purpureae* | *Salicion albae* | *Salicetum albae* | 12 | 91E0 (prior.) | | 2 |
| *Salix rubens* | 23 | 91E0 (prior.) | | 2 |
| *Salicetum fragilis* | 15 | 91E0 (prior.) | | 2 |
| *Salicion  eleagno-daphnoidis* | *Salicetum eleagno-purpureae* | 15 | 3240 | | 2 |

**Table S1.** *Cont.*

| Class | Alliance | Association | Constancy of occurrence (%) | Habitats Directive  Annex I | Conservation status (AT) * |
| --- | --- | --- | --- | --- | --- |
| Shrubs |  |  |  |  |  |
| *Rhamno-Prunetea* | *Berberidion vulgaris* | *Festuco-Juniperetum sabinae* | 19 | - | ***** |
| *Berberido-Rosetum* | 3 | - | R |
| *Cotoneastro-Amelanchieretum* | 50 | - | * |
| *Pruno-Ligustretum* | 36 | - | * |
| *Hippophao-Berberidetum* | 54 | 3240 | 1 |
| *Salici-Viburnetum opuli* | 39 | - | ***** |
| *Roso-Ulmetum campestris* | 15 | - | 3 |
| *Carpino-Prunion* | *Crataego-Prunetum spinosae* | 28 | - | ***** |
| *Arctio-Sambucion nigrae* | *Lycietum halimifolii* | 5 | - | NA |
| *Balloto-Prunetum domesticae* | 8 | - | NA |
| *Chelidonio-Robinietum* | 33 | - | NA |
| *Balloto-Robinietum* | 10 | - | NA |
| *Populo-Corylion* | *Populo-Coryletum* | 60 | - | ***** |
| *Senecioni-Coryletum* | 59 | - | ***** |
| *Sambuco-Salicion* | *Rubo idaei-Sambucetum nigrae* | 55 | - | ***** |
| *Senecioni-Sambucetum racemosae* | 29 | - | ***** |

© 2015 by the authors; licensee MDPI, Basel, Switzerland. This article is an open access article distributed under the terms and conditions of the Creative Commons Attribution license (http://creativecommons.org/licenses/by/4.0/).
